# Supplementary material for: Quantitative evaluation of pregnant women delivery status’ records in Akure, Nigeria
Source: PubMed Central journal article supplement (PMC5699871; doi:10.1016/j.dib.2017.11.041), 2017-11-14
Supplement: mmc1.pdf [file mmc1.pdf]

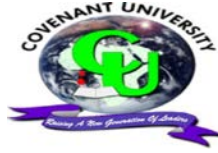

**COVENANT UNIVERSITY**  
**COLLEGE OF SCIENCE AND TECHNOLOGY**  
**DEPARTMENT OF MATHEMATICS**

CANAANLAND, KM 10, IDIROKO ROAD  
P.M.B 1023, OTA, OGUN STATE, NIGERIA

[www.covenantuniversity.edu.ng](http://www.covenantuniversity.edu.ng), [mat.covenantuniversity.edu.ng](http://mat.covenantuniversity.edu.ng)

**EXTERNAL MEMO**

---

---

**To:** Editor, Data in Brief  
**From:** Corresponding Author  
**Date:** 15<sup>th</sup> October, 2017  
**Subject:** **Conflict of Interest**

---

---

I thereby declare the absence of any conflict of interest among the authors.

The authors have read the final draft and unanimously agreed that the paper be sent for review.

The source of funding and data have been acknowledged.

**Hilary I. Okagbue**

Department of Mathematics, Covenant University, Ota.

Google Scholar: Hilary Izuchukwu Okagbue

Research Gate: Hilary Okagbue

Live DNA: 234.14453

Scopus ID: 56438006100

ORCID: 0000-0002-3779-9763
